# Supplementary material
Source: PubMed Central journal article supplement (PMC4342324)
Supplement: NIHMS651572-supplement-1.pdf [file NIHMS651572-supplement-1.pdf]

SUPPLEMENTAL MATERIAL

Table I. Ninety-day Post-stroke Functional Outcomes by Sex.

| ADL and IADL items (range:1-4)    | Male (N=190) |        |                                     | Female (N=209) |        |                                     | beta* | (SE)   | p-value# |
|-----------------------------------|--------------|--------|-------------------------------------|----------------|--------|-------------------------------------|-------|--------|----------|
|                                   | Mean         | (SD)   | % Reporting "Can only do with help" | Mean           | (SD)   | % Reporting "Can only do with help" |       |        |          |
| Average ADL                       | 1.86         | (1.01) |                                     | 2.22           | (1.12) |                                     | 0.25  | (0.10) | 0.013    |
| Walking Across Room               | 2.01         | (1.27) | 26.32                               | 2.42           | (1.34) | 37.32                               | 0.30  | (0.13) | 0.017    |
| Bathing                           | 2.21         | (1.34) | 33.16                               | 2.60           | (1.39) | 47.37                               | 0.25  | (0.13) | 0.055    |
| Brushing                          | 1.55         | (1.06) | 13.68                               | 1.84           | (1.20) | 20.57                               | 0.18  | (0.11) | 0.095    |
| Eating                            | 1.62         | (1.03) | 12.63                               | 1.88           | (1.21) | 21.05                               | 0.21  | (0.11) | 0.068    |
| Dressing                          | 2.07         | (1.27) | 27.37                               | 2.36           | (1.32) | 34.93                               | 0.20  | (0.13) | 0.115    |
| Moving                            | 1.76         | (1.19) | 20.00                               | 2.25           | (1.36) | 34.93                               | 0.39  | (0.12) | 0.002    |
| Using Toilet                      | 1.78         | (1.26) | 23.16                               | 2.17           | (1.37) | 33.49                               | 0.26  | (0.13) | 0.041    |
| Average IADL                      | 2.42         | (1.06) |                                     | 2.88           | (0.97) |                                     | 0.37  | (0.10) | 0.000    |
| Pulling/Pushing                   | 2.60         | (1.31) | 42.63                               | 3.15           | (1.21) | 62.68                               | 0.47  | (0.12) | 0.000    |
| Stooping                          | 2.64         | (1.28) | 43.16                               | 3.16           | (1.14) | 59.81                               | 0.44  | (0.12) | 0.000    |
| Lifting                           | 2.48         | (1.33) | 39.47                               | 3.25           | (1.14) | 65.07                               | 0.70  | (0.12) | <.0001   |
| Reaching                          | 1.95         | (1.21) | 22.11                               | 2.41           | (1.30) | 35.41                               | 0.40  | (0.13) | 0.002    |
| Getting Up From Stooping          | 2.89         | (1.23) | 51.58                               | 3.36           | (1.05) | 68.90                               | 0.41  | (0.11) | 0.000    |
| Standing Up After Sitting         | 2.05         | (1.19) | 22.63                               | 2.38           | (1.25) | 31.58                               | 0.22  | (0.12) | 0.059    |
| Walking Up One Stair              | 2.53         | (1.37) | 43.16                               | 3.15           | (1.20) | 62.20                               | 0.53  | (0.13) | <.0001   |
| Writing or Handling Small Objects | 1.89         | (1.15) | 18.42                               | 2.22           | (1.27) | 28.71                               | 0.23  | (0.12) | 0.056    |
| Walking Quarter Mile              | 2.65         | (1.37) | 47.37                               | 3.23           | (1.21) | 68.42                               | 0.48  | (0.13) | 0.000    |
| Walking Up 10 Steps               | 2.48         | (1.37) | 42.11                               | 3.05           | (1.32) | 64.11                               | 0.48  | (0.13) | 0.000    |
| Using Telephone                   | 1.70         | (1.16) | 17.89                               | 1.94           | (1.27) | 23.92                               | 0.11  | (0.12) | 0.336    |
| Managing Money                    | 2.42         | (1.45) | 44.21                               | 2.59           | (1.44) | 49.28                               | 0.06  | (0.14) | 0.675    |
| Doing All Cooking                 | 2.57         | (1.43) | 48.42                               | 2.92           | (1.36) | 59.33                               | 0.23  | (0.14) | 0.091    |
| Doing Heavy Housework             | 2.79         | (1.36) | 53.16                               | 3.33           | (1.14) | 72.25                               | 0.46  | (0.12) | 0.000    |
| Doing All Shopping                | 2.65         | (1.39) | 49.47                               | 3.10           | (1.30) | 65.55                               | 0.34  | (0.13) | 0.010    |

ADL = Activities of Daily Living, IADL = Instrumental Activities of Daily Living, SD = standard deviation, SE = standard error

\* Age-adjusted mean difference comparing female to male

# p-value from age-adjusted linear regression

Table II. Multivariable Tobit Model of the Association Between Sex and Ninety-day Post-stroke Functional Outcome Measured as Average ADL/IADL Score (score ranging from 1 (no difficulty) to 4 (can only do with help)).

| Variable                                 | Estimate | 95% CI      |
|------------------------------------------|----------|-------------|
| Female sex*                              |          |             |
| Mean of NIHSS (6)                        | 0.40     | 0.18, 0.63  |
| 25 <sup>th</sup> percentile of NIHSS (2) | 0.31     | 0.08, 0.54  |
| 50 <sup>th</sup> percentile of NIHSS (4) | 0.37     | 0.17, 0.57  |
| 75 <sup>th</sup> percentile of NIHSS (8) | 0.42     | 0.15, 0.68  |
| Age                                      | 0.02     | 0.01, 0.03  |
| Race-ethnicity                           |          |             |
| White                                    | ref      |             |
| Mexican American                         | 0.33     | 0.14, 0.52  |
| African American                         | 0.16     | -0.28, 0.60 |
| Other                                    | 0.05     | -0.52, 0.63 |
| Marital status                           |          |             |
| Married/living with someone              | ref      |             |
| Single                                   | 0.31     | -0.06, 0.68 |
| Widowed                                  | -0.08    | -0.31, 0.16 |
| Divorced/separated                       | -0.06    | -0.32, 0.19 |
| Pre-stroke nursing home residence        | 0.44     | -0.05, 0.93 |
| Pre-stroke modified Rankin Scale         |          |             |
| 0-1                                      | ref      |             |
| 2-3                                      | 0.36     | 0.17, 0.55  |
| 4+                                       | 0.59     | 0.23, 0.94  |
| Pre-stroke IQCODE                        | 0.16     | -0.03, 0.35 |
| Comorbidity index                        | 0.15     | 0.09, 0.22  |
| CAD/MI                                   | -0.19    | -0.41, 0.03 |
| History of stroke/TIA                    | 0.13     | -0.08, 0.33 |
| BMI                                      | 0.00     | -0.01, 0.02 |

IQCODE=Informant Questionnaire for Cognitive Decline in the Elderly; CAD=coronary artery disease; MI=myocardial infarction; TIA=transient ischemic attack; BMI=body mass index; NIHSS=National Institute for Health Stroke Scale.

\* Evaluated at various values of NIHSS given interaction between sex and NIHSS.

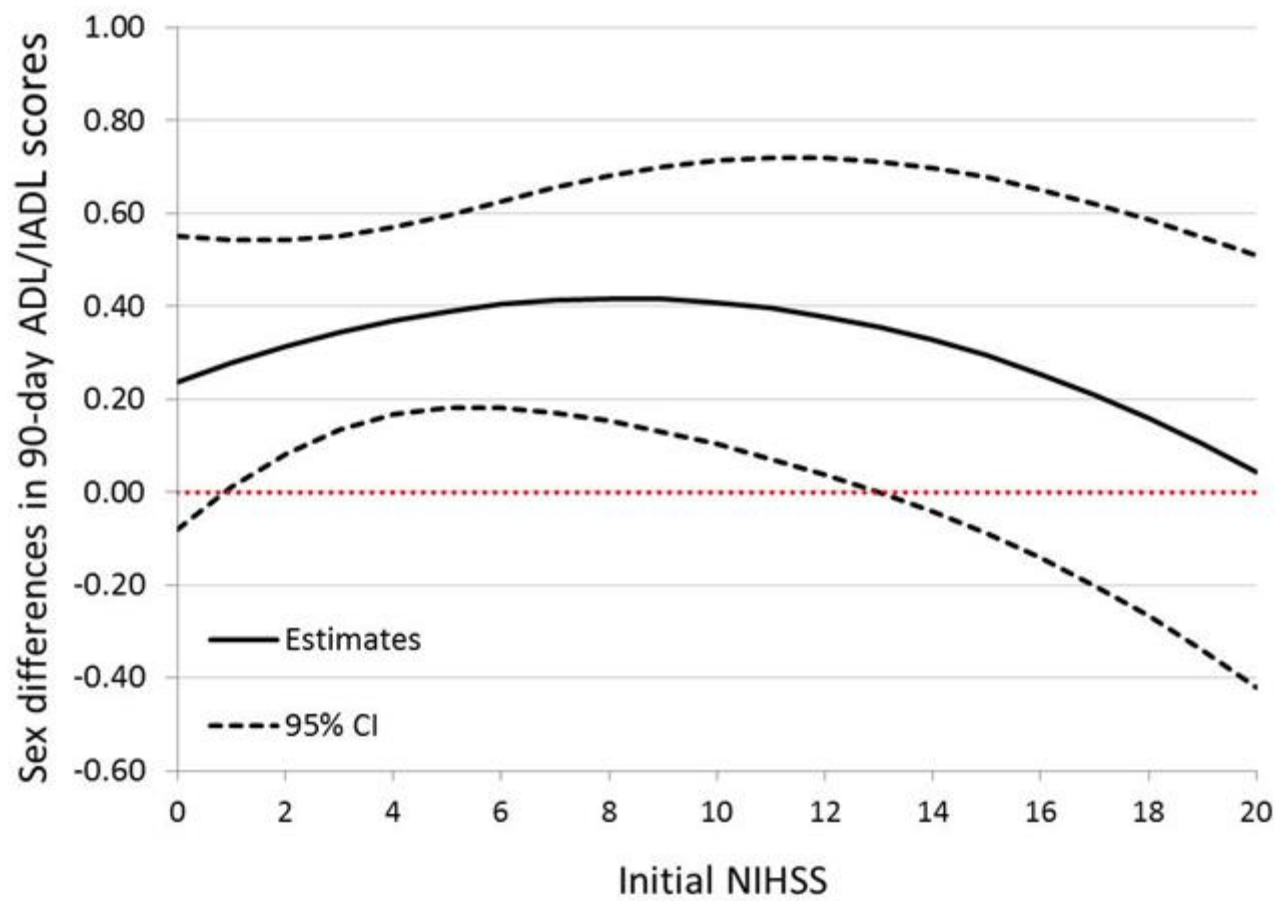

Figure I. Effect Modification of the Sex Difference in Functional Outcome by Initial Stroke Severity (NIHSS=National Institute for Health Stroke Scale).

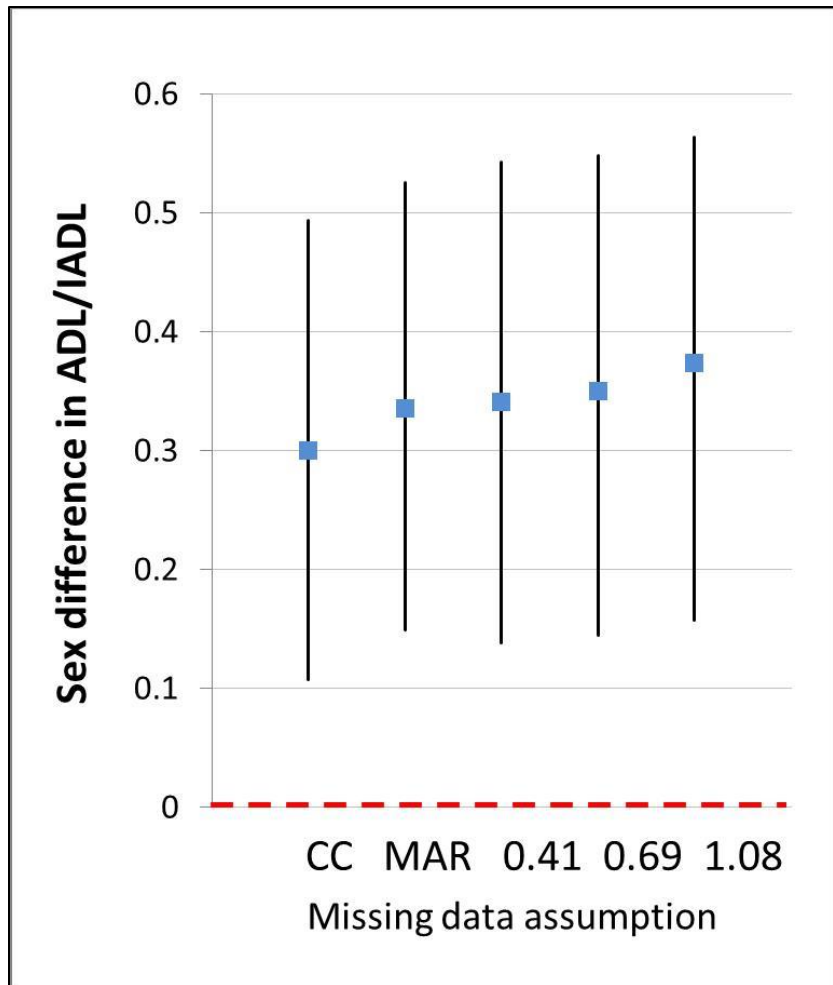

Figure II. Results of Sensitivity Analysis for Missing Data. Sex differences in ADL/IADL score across a range of assumed missing data mechanisms (x-axis: CC=complete case analysis, MAR = data missing at random, and three assumed values of the difference in scores that those missing would have after adjusting for covariates in the model).
